# Supplementary material for: Metamaterial Absorbers for Infrared Detection of Molecular Self-Assembled Monolayers
Source: PubMed Central journal article supplement (PMC4521146; doi:10.1038/srep12570), 2015-07-31
Supplement: srep12570-s1.pdf [file srep12570-s1.pdf]

## Supplementary Information

### Metamaterial Absorbers for Infrared Detection of Molecular Self-Assembled Monolayers

Atsushi Ishikawa<sup>1,2,a)</sup> and Takuo Tanaka<sup>2,3,4</sup>

<sup>1</sup>*Department of Electrical and Electronic Engineering, Okayama University, 3-1-1 Tsushima-naka, Kitaku, Okayama, Okayama 700-8530, Japan*

<sup>2</sup>*Metamaterials Laboratory, RIKEN, 2-1 Hirosawa, Wako, Saitama 351-0198, Japan*

<sup>3</sup>*Research Institute for Electronic Science, Hokkaido University, N21W10 Kitaku, Sapporo, Hokkaido 001-0020, Japan*

<sup>4</sup>*Department of Innovative and Engineered Materials, Tokyo Institute of Technology, 4259 Nagatsuta-cho, Midoriku, Yokohama, Kanagawa 226-8503, Japan*

<sup>a)</sup> Electronic mail: a-ishikawa@okayama-u.ac.jp.

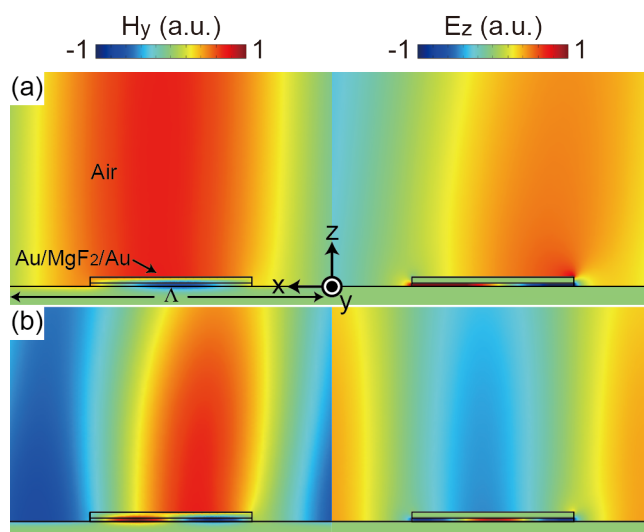

**Figure S1 | Mode profiles of SPPs.** Corresponding H<sub>y</sub> and E<sub>z</sub> distributions of the minor absorption dips at  $\theta = 80^\circ$  in Fig. 2(b): (a) at 1690 cm<sup>-1</sup> and (b) at 3370 cm<sup>-1</sup>.
